# Supplementary material
Source: Elsevier journal article supplement (https://www.sciencedirect.com/science/article/pii/S1575181320301923)
Supplement: mmc1 [file S1575181320301923:mmc1.pdf]

## Apéndice A: Escenarios y objetivos

| Nombre del Escenario                                                                                                                                             | Objetivos del Escenario                                                                                                                                                                                                                                                                                                                                                                                                                                                                                                                                                                                                                                                                                                                                                                                                                                                                                                                                                           |
|------------------------------------------------------------------------------------------------------------------------------------------------------------------|-----------------------------------------------------------------------------------------------------------------------------------------------------------------------------------------------------------------------------------------------------------------------------------------------------------------------------------------------------------------------------------------------------------------------------------------------------------------------------------------------------------------------------------------------------------------------------------------------------------------------------------------------------------------------------------------------------------------------------------------------------------------------------------------------------------------------------------------------------------------------------------------------------------------------------------------------------------------------------------|
| <b>Enfermedad que amenaza la vida</b><br>Juan López, un bebé de tres meses que después de un examen específico se sospechaba que tenía meningitis.               | <ol style="list-style-type: none"> <li>1. Reunirse con el paciente durante su momento de ansiedad e incertidumbre.</li> <li>2. Entender que las conversaciones de cada día pueden ser el "comienzo" de la relación terapéutica.</li> <li>3. Ofrecer apoyo e información sin tranquilizar falsamente o proporcionar prematuramente resultados desconocidos.</li> <li>4. Aprender que hay situaciones en las que el clínico necesita estar presente, escuchar, trabajar como parte de un equipo y proporcionar apoyo.</li> </ol>                                                                                                                                                                                                                                                                                                                                                                                                                                                    |
| <b>Enfermedad grave</b><br>Carlos Rodríguez, un paciente que presenta "dificultad para respirar", el diagnóstico es completamente inesperado.                    | <ol style="list-style-type: none"> <li>1. Compartir noticias malas e inesperadas.</li> <li>2. Ayudar al paciente a comenzar el proceso de comprensión del significado de la noticia.</li> <li>3. Comenzar a entender la experiencia y perspectiva de los pacientes sobre las noticias.</li> <li>4. Demostrar y aplicar una amplia gama de habilidades de comunicación efectiva en el cuidado de la salud y habilidades relacionales para optimizar la experiencia del paciente, la familia y el médico.</li> </ol>                                                                                                                                                                                                                                                                                                                                                                                                                                                                |
| <b>Muerte inesperada / situación de fin de vida</b><br>Milagros Rivera, una joven que sufrió un accidente y murió como consecuencia del mismo.                   | <ol style="list-style-type: none"> <li>1. Aplicar una serie de habilidades de comunicación en conversaciones con pacientes recientemente fallecidos por muerte traumática y sus familias.</li> <li>2. Aprender la gama de conversaciones sobre el fin de la vida, incluyendo aquellas en las que la muerte es gradual y aquellas en las que la muerte es repentina, inesperada y traumática.</li> </ol>                                                                                                                                                                                                                                                                                                                                                                                                                                                                                                                                                                           |
| <b>Error Médico:</b><br>Estuardo Salvatierra, un paciente de 55 años de edad que fue mal diagnosticado y tuvo que recibir una explicación de los médicos a cargo | <ol style="list-style-type: none"> <li>1. Demostrar habilidades para informar sobre el error médico.</li> <li>2. Reconocer los marcos mentales y la experiencia previa que pueden afectar una conversación después de un error médico.</li> <li>3. Explicar brevemente y sin miedo lo que causa el error médico.</li> <li>4. Aprender las circunstancias y exigencias de las conversaciones que tratan sobre el error médico</li> <li>5. Determinar si la situación alcanza el umbral para revelar el error médico al paciente y a la familia.</li> <li>6. Entender el trabajo en equipo y la preparación individual que se requiere antes de mantener conversaciones sobre el error médico.</li> <li>7. Desarrollar estrategias para escuchar atentamente al paciente, pedir disculpas/expresar arrepentimiento, describir lo que se ha hecho para abordar el error médico y explicar qué medidas se pueden tomar para prevenir futuros errores médicos de este tipo.</li> </ol> |
